# Supplementary material
Source: publisher site journal article supplement (https://www.dovepress.com/article/283732)
Supplement: Supplementary file 1 [file get_supplementary_file.php]

**Bibliometric analysis of published research articles on elderly pain from 2000 to 2019.**

**Data retrieval strategy**

Search terms Web of science:

|                                  |                                                                                                                                                                                                                                                                                                                                       |
|----------------------------------|---------------------------------------------------------------------------------------------------------------------------------------------------------------------------------------------------------------------------------------------------------------------------------------------------------------------------------------|
| elderly                          | pain                                                                                                                                                                                                                                                                                                                                  |
| Aging or aged or elderly or old* | pain* or nocicep* or ache* or analg* or headache* or migraine* or "stomach ache*" or "abdominal ache*" or toothache* or "neck pain" or "back pain" or "musculoskeletal pain" or sciatic* or fibromyalg* or neuralgi* or hyperalg* or radiculalg* or arthralg* or causalg* or earache* or "cancer pain" or osteoarthritis or arthritis |



































































































































## Supplement 3: Country Data

| country                                                                  | Total number of publications between 2000-2019 | Percentage of publications between 2000-2019 |
|--------------------------------------------------------------------------|------------------------------------------------|----------------------------------------------|
| USA                                                                      | 741                                            | 35.20%                                       |
| Australia                                                                | 175                                            | 8.31%                                        |
| United Kingdom (including England, Scotland, Northern Ireland and Wales) | 167                                            | 7.93%                                        |
| China                                                                    | 136                                            | 6.46%                                        |
| Japan                                                                    | 97                                             | 4.61%                                        |
| Canada                                                                   | 89                                             | 4.23%                                        |
| Italy                                                                    | 76                                             | 3.61%                                        |
| Netherlands                                                              | 70                                             | 3.33%                                        |
| Germany                                                                  | 62                                             | 2.95%                                        |
| Brazil                                                                   | 56                                             | 2.66%                                        |
| Sweden                                                                   | 57                                             | 2.71%                                        |
| South Korea                                                              | 54                                             | 2.57%                                        |
| France                                                                   | 49                                             | 2.33%                                        |
| Turkey                                                                   | 46                                             | 2.19%                                        |
| Spain                                                                    | 43                                             | 2.04%                                        |
| Finland                                                                  | 28                                             | 1.33%                                        |
| Poland                                                                   | 18                                             | 0.86%                                        |
| Switzerland                                                              | 16                                             | 0.76%                                        |
| Norway                                                                   | 14                                             | 0.67%                                        |
| Denmark                                                                  | 15                                             | 0.71%                                        |
| Ireland                                                                  | 13                                             | 0.62%                                        |
| Israel                                                                   | 11                                             | 0.52%                                        |
| Thailand                                                                 | 9                                              | 0.43%                                        |
| Portugal                                                                 | 9                                              | 0.43%                                        |
| Singapore                                                                | 8                                              | 0.38%                                        |
| New Zealand                                                              | 8                                              | 0.38%                                        |
| Austria                                                                  | 8                                              | 0.38%                                        |
| Iran                                                                     | 7                                              | 0.33%                                        |
| Belgium                                                                  | 7                                              | 0.33%                                        |
| Serbia                                                                   | 4                                              | 0.19%                                        |
| Saudi Arabia                                                             | 4                                              | 0.19%                                        |
| Malaysia                                                                 | 4                                              | 0.19%                                        |
| Russia                                                                   | 2                                              | 0.10%                                        |
| Lebanon                                                                  | 2                                              | 0.10%                                        |
| Egypt                                                                    | 2                                              | 0.10%                                        |
| Senegal                                                                  | 1                                              | 0.05%                                        |
| Pakistan                                                                 | 1                                              | 0.05%                                        |
| Mexico                                                                   | 1                                              | 0.05%                                        |
| Indonesia                                                                | 1                                              | 0.05%                                        |
| Iceland                                                                  | 1                                              | 0.05%                                        |
| Hungary                                                                  | 1                                              | 0.05%                                        |
| Greece                                                                   | 1                                              | 0.05%                                        |
| Chile                                                                    | 1                                              | 0.05%                                        |
| Bosnia and Herzegovina.                                                  | 1                                              | 0.05%                                        |
| Bangladesh                                                               | 1                                              | 0.05%                                        |
| Nigeria                                                                  | 1                                              | 0.05%                                        |
| India                                                                    | 1                                              | 0.05%                                        |
| Costa Rica                                                               | 1                                              | 0.05%                                        |

**Table 1** The coding rules of topic.

| Code                | Definition                                                                                                                                                                                                                                                                                                                                                                                                                                             |
|---------------------|--------------------------------------------------------------------------------------------------------------------------------------------------------------------------------------------------------------------------------------------------------------------------------------------------------------------------------------------------------------------------------------------------------------------------------------------------------|
| Pain assessment     | Articles focuses on pain assessment or pain diagnostic tests. For example, the efficacy and cost of a diagnostic test, rather than the establishment of a scale                                                                                                                                                                                                                                                                                        |
| Pain intervention   | The article focuses on interventions for pain (eg, applying surgical procedures, physical / behavior, etc.). Such as articles on the efficacy, side effects and cost-effectiveness of pain treatment and also included is to explain the mechanism of action of the intervention (non-clinical research). In addition, articles reporting on clinical pain management, training, experimental ethics, or health care policies / use are also included. |
| Pain characteristic | Articles describing the prevalence, morbidity (ie epidemiology) of pain, articles describing pain-related predictors or risk factors and their impact on other variables                                                                                                                                                                                                                                                                               |
| Model development   | Describe the reliability and validity of scales, questionnaires, models, techniques, diagnostic tests, or describe (or refine, translate, evaluate) their usefulness.                                                                                                                                                                                                                                                                                  |
| Procedural factors  | Articles about the regulation of procedural factors in pain (especially immune-related articles)                                                                                                                                                                                                                                                                                                                                                       |
| Biological factors  | Articles on the regulatory effects of biological factors, body factors or molecules on pain, also including the study of physiological processes related to pain                                                                                                                                                                                                                                                                                       |
| Family factors      | Articles about the regulation of family-related factors on pain or the effect of pain on family function (such as spouse, children, etc.)                                                                                                                                                                                                                                                                                                              |

**Table 2** The coding rules of pain characteristic.

| Code                 | Definition                                                                                                                                                                                                                                                                                                                                                                                                                                                                                                                                                                                                                                                                                                                                                                                       |
|----------------------|--------------------------------------------------------------------------------------------------------------------------------------------------------------------------------------------------------------------------------------------------------------------------------------------------------------------------------------------------------------------------------------------------------------------------------------------------------------------------------------------------------------------------------------------------------------------------------------------------------------------------------------------------------------------------------------------------------------------------------------------------------------------------------------------------|
| Disease-related pain | Experience pain related to disease (such as musculoskeletal disease or cancer-related pain)                                                                                                                                                                                                                                                                                                                                                                                                                                                                                                                                                                                                                                                                                                      |
| Experimental pain    | Pain caused by experiments (including animals and humans):<br>Mechanical: mechanical force (dynamic or static pressure, expansion or vibration) was applied or elicited by an action of the subject (animal or human);<br>Electrical: Stimulate the subject's body with electric current to cause pain.<br>Thermal: heat or cold stimuli were applied;<br>Nerve Damage: Traumatic (surgical) or chemical nerve injury;<br>Inflammation: Operation using known inflammatory substances or releasing chemical aldehydes (aldehydes include carrageenan, Freund's adjuvant, hypotonic / hypertonic saline) to get them into paws or knees'<br>Injury model: an animal model that adopts a specific human clinical pain state (such as amputation, fracture, burn, laparotomy, polyarthritis model). |
| Acute pain           | Samples of subjects currently experiencing acute pain (eg, acute abdominal pain, immunization, blood draw, postoperative pain) or review theoretical paper relates to acute pain. If the article reviews or investigates acute pain, then the type of acute pain was coded as following Surgical pain:                                                                                                                                                                                                                                                                                                                                                                                                                                                                                           |

---

|              |                                                                                                                                                                                                                                                                                                                                                                                                                |
|--------------|----------------------------------------------------------------------------------------------------------------------------------------------------------------------------------------------------------------------------------------------------------------------------------------------------------------------------------------------------------------------------------------------------------------|
| Chronic pain | pain related to surgery or operation (eg, postsurgical pain)<br>Procedural pain: pain related to a medical procedure (eg, immunization pain, lumbar punctures, pain due to dental procedure).<br>Samples of subjects diagnosed with a chronic, persistent, or recurrent pain condition or review/ theoretical paper relates to a chronic pain condition (eg, dysmenorrhea, chronic abdominal pain, migraines). |
|--------------|----------------------------------------------------------------------------------------------------------------------------------------------------------------------------------------------------------------------------------------------------------------------------------------------------------------------------------------------------------------------------------------------------------------|

---

**Supplement 5** Top 20 original articles with the highest total citation scores.

| <b>Rank</b> | <b>Year</b> | <b>Authors</b>  | <b>Title</b>                                                                                                                                                                 | <b>Journal</b>                       | <b>Citation Score</b> |
|-------------|-------------|-----------------|------------------------------------------------------------------------------------------------------------------------------------------------------------------------------|--------------------------------------|-----------------------|
| <b>1</b>    | 2004        | Messier et al.  | Exercise and dietary weight loss in overweight and obese older adults with knee osteoarthritis - The arthritis, diet, and activity promotion trial                           | <i>Arthritis and Rheumatism</i>      | 611.00                |
| <b>2</b>    | 2003        | Lin et al.      | Effect of improving depression care on pain and functional outcomes among older adults with arthritis - A randomized controlled trial                                        | <i>JAMA</i>                          | 375.00                |
| <b>3</b>    | 2004        | Thomas et al.   | The prevalence of pain and pain interference in a general population of older adults: cross-sectional findings from the North Staffordshire Osteoarthritis Project (NorStOP) | <i>PAIN</i>                          | 314.00                |
| <b>4</b>    | 2004        | Herr et al.     | Pain intensity assessment in older adults - Use of experimental pain to compare psychometric properties and usability of selected pain scales with younger adults            | <i>Clinical Journal of Pain</i>      | 267.00                |
| <b>5</b>    | 2008        | Morone et al.   | Mindfulness meditation for the treatment of chronic low back pain in older adults: A randomized controlled pilot study                                                       | <i>PAIN</i>                          | 249.00                |
| <b>6</b>    | 2001        | Jones et al.    | The effect of age on pain, function, and quality of life after total hip and knee arthroplasty                                                                               | <i>Archives of Internal Medicine</i> | 236.00                |
| <b>7</b>    | 2010        | Solomon et al.  | The comparative safety of analgesics in older adults with arthritis                                                                                                          | <i>Archives of Internal Medicine</i> | 236.00                |
| <b>8</b>    | 2009        | Leveille et al. | Chronic musculoskeletal pain and the occurrence of falls in an older population                                                                                              | <i>JAMA</i>                          | 228.00                |
| <b>9</b>    | 2005        | Gagliese et al. | The measurement of postoperative pain: A comparison of intensity scales in younger and older surgical patients                                                               | <i>PAIN</i>                          | 226.00                |

---

|           |      |                     |                                                                                                                                                                                   |                                       |        |
|-----------|------|---------------------|-----------------------------------------------------------------------------------------------------------------------------------------------------------------------------------|---------------------------------------|--------|
| <b>10</b> | 2005 | Lautenbacher et al. | Age effects on pain thresholds, temporal summation and spatial summation of heat and pressure pain                                                                                | <i>PAIN</i>                           | 211.00 |
| <b>11</b> | 2003 | Edwards et al.      | Age-related differences in endogenous pain modulation: a comparison of diffuse noxious inhibitory controls in healthy older and younger adults                                    | <i>PAIN</i>                           | 209.00 |
| <b>12</b> | 2013 | Patel et al.        | Prevalence and impact of pain among older adults in the United States: Findings from the 2011 National Health and Aging Trends Study                                              | <i>PAIN</i>                           | 207.00 |
| <b>13</b> | 2000 | Wang et al.         | Chronic daily headache in Chinese elderly - Prevalence, risk factors, and biannual follow-up                                                                                      | <i>Neurology</i>                      | 203.00 |
| <b>14</b> | 2001 | Baker et al.        | The efficacy of home based progressive strength training in older adults with knee osteoarthritis: A randomized controlled trial                                                  | <i>Journal of Rheumatology</i>        | 199.00 |
| <b>15</b> | 2007 | Raskin et al.       | Efficacy of duloxetine on cognition, depression, and pain in elderly patients with major depressive disorder: An 8-week, double-blind, placebo-controlled trial                   | <i>American Journal of Psychiatry</i> | 198.00 |
| <b>16</b> | 2004 | Dawson et al.       | Epidemiology of hip and knee pain and its impact on overall health status in older adults                                                                                         | <i>Rheumatology</i>                   | 190.00 |
| <b>17</b> | 2003 | Song et al.         | Effects of tai chi exercise on pain, balance, muscle strength, and perceived difficulties in physical functioning in older women with osteoarthritis: A randomized clinical trial | <i>Journal of Rheumatology</i>        | 186.00 |

---



---

|           |      |                   |                                                                                                                                                               |                                           |        |
|-----------|------|-------------------|---------------------------------------------------------------------------------------------------------------------------------------------------------------|-------------------------------------------|--------|
| <b>18</b> | 2000 | Mann et al.       | Comparison of intravenous or epidural patient-controlled analgesia in the elderly after major abdominal surgery                                               | <i>Anesthesiology</i>                     | 182.00 |
| <b>19</b> | 2009 | Vitiello et al.   | Cognitive behavioral therapy for insomnia improves sleep and decreases pain in older adults with co-morbid insomnia and osteoarthritis                        | <i>Journal of Clinical Sleep Medicine</i> | 177.00 |
| <b>20</b> | 2006 | Paradowski et al. | Knee complaints vary with age and gender in the adult population. Population-based reference data for the knee injury and osteoarthritis outcome score (KOOS) | <i>Bmc Musculoskeletal Disorders</i>      | 170.00 |

---

## Supplement 6: Top 20 Original Articles with the Highest Relative Citation Scores

**Supplement 6** Top 20 original articles with the highest relative citation scores.

| <b>Rank</b> | <b>Year</b> | <b>Author</b>   | <b>Title</b>                                                                                                                                                                         | <b>Journal</b>                       | <b>Relative Citation Scores</b> |
|-------------|-------------|-----------------|--------------------------------------------------------------------------------------------------------------------------------------------------------------------------------------|--------------------------------------|---------------------------------|
| <b>1</b>    | 2004        | Messier et al.  | Exercise and dietary weight loss in overweight and obese older adults with knee osteoarthritis - The arthritis, diet, and activity promotion trial                                   | <i>Arthritis and Rheumatism</i>      | 38.19                           |
| <b>2</b>    | 2013        | Patel et al.    | Prevalence and impact of pain among older adults in the United States: Findings from the 2011 National Health and Aging Trends Study                                                 | <i>PAIN</i>                          | 29.57                           |
| <b>3</b>    | 2010        | Solomon et al.  | The comparative safety of analgesics in older adults with arthritis                                                                                                                  | <i>Archives of Internal Medicine</i> | 23.60                           |
| <b>4</b>    | 2017        | Avidan et al.   | Intraoperative ketamine for prevention of postoperative delirium or pain after major surgery in older adults: an international, multicentre, double-blind, randomised clinical trial | <i>Lancet</i>                        | 23.33                           |
| <b>5</b>    | 2003        | Lin et al.      | Effect of improving depression care on pain and functional outcomes among older adults with arthritis - A randomized controlled trial                                                | <i>JAMA</i>                          | 22.06                           |
| <b>6</b>    | 2008        | Morone et al.   | Mindfulness meditation for the treatment of chronic low back pain in older adults: A randomized controlled pilot study                                                               | <i>PAIN</i>                          | 20.75                           |
| <b>7</b>    | 2009        | Leveille et al. | Chronic musculoskeletal pain and the occurrence of falls in an older population                                                                                                      | <i>JAMA</i>                          | 20.73                           |
| <b>8</b>    | 2004        | Thomas et al.   | The prevalence of pain and pain interference in a general population of older adults: cross-sectional findings from the North Staffordshire Osteoarthritis Project (NorStOP)         | <i>PAIN</i>                          | 19.63                           |

---

|           |      |                 |                                                                                                                                                                   |                                             |       |
|-----------|------|-----------------|-------------------------------------------------------------------------------------------------------------------------------------------------------------------|---------------------------------------------|-------|
| <b>9</b>  | 2004 | Herr et al.     | Pain intensity assessment in older adults - Use of experimental pain to compare psychometric properties and usability of selected pain scales with younger adults | <i>Clinical Journal of Pain</i>             | 16.69 |
| <b>10</b> | 2013 | Langan et al.   | Herpes zoster vaccine effectiveness against incident herpes zoster and post-herpetic neuralgia in an older US population: A cohort study                          | <i>PLoS Medicine</i>                        | 16.43 |
| <b>11</b> | 2016 | Morone et al.   | A mind-body program for older adults with chronic low back pain a randomized clinical trial                                                                       | <i>JAMA Internal Medicine</i>               | 16.25 |
| <b>12</b> | 2009 | Vitiello et al. | Cognitive behavioral therapy for insomnia improves sleep and decreases pain in older adults with co-morbid insomnia and osteoarthritis                            | <i>Journal of Clinical Sleep Medicine</i>   | 16.09 |
| <b>13</b> | 2010 | Saunders et al. | Relationship of opioid use and dosage levels to fractures in older chronic pain patients                                                                          | <i>Journal of General Internal Medicine</i> | 15.50 |
| <b>14</b> | 2007 | Raskin et al.   | Efficacy of duloxetine on cognition, depression, and pain in elderly patients with major depressive disorder: An 8-week, double-blind, placebo-controlled trial   | <i>American Journal of Psychiatry</i>       | 15.23 |
| <b>15</b> | 2005 | Gagliese et al. | The measurement of postoperative pain: A comparison of intensity scales in younger and older surgical patients                                                    | <i>PAIN</i>                                 | 15.07 |
| <b>16</b> | 2009 | Muraki et al.   | Prevalence of radiographic knee osteoarthritis and its association with knee pain in the elderly of Japanese population-based cohorts: The ROAD study             | <i>Osteoarthritis and Cartilage</i>         | 14.91 |

---

---

|    |      |                     |                                                                                                                                            |                                         |       |
|----|------|---------------------|--------------------------------------------------------------------------------------------------------------------------------------------|-----------------------------------------|-------|
| 17 | 2013 | Stannus et al.      | Associations between serum levels of inflammatory markers and change in knee pain over 5 years in older adults: a prospective cohort study | <i>Annals of the Rheumatic Diseases</i> | 14.29 |
| 18 | 2005 | Lautenbacher et al. | Age effects on pain thresholds, temporal summation and spatial summation of heat and pressure pain                                         | <i>PAIN</i>                             | 14.07 |
| 19 | 2010 | Solomon et al.      | The comparative safety of opioids for nonmalignant pain in older adults                                                                    | <i>Archives of Internal Medicine</i>    | 14.00 |
| 20 | 2011 | Kurth et al.        | Headache, migraine, and structural brain lesions and function: population based epidemiology of vascular ageing-MRI study                  | <i>British Medical Journal</i>          | 13.44 |

---
